# Supplementary material
Source: Research Square preprint supplement (doi:10.21203/rs.3.rs-8719220/v1)
Supplement: Supplementary file 1 [file 8e9ccf6c9b146754caa4155a.xlsx]

## Sheet: Sheet1
Likert-Scale
Likert Score	Description
1	Non-diagnostic image quality – Severe motion blur, absence of key anatomical points, significantly reduced contrast, and pronounced susceptibility artifacts, making the image non-diagnostic.
2	Poor image quality – Noticeable motion blur, limited identification of key anatomical points, reduced contrast, and susceptibility artifacts that make diagnostic interpretation difficult.
3	Acceptable image quality – Some motion blur present, but key anatomical points can still be identified. Contrast is adequate, with reasonable susceptibility artifacts that do not impede diagnostic use.
4	Good image quality – Minimal motion blur, all key anatomical points are clearly visible, good image contrast, and minimal susceptibility artifacts. Diagnostic quality is reliable.
5	Excellent image quality – No motion blur, key anatomical points are sharply delineated at all times, optimal contrast, and no susceptibility artifacts. Image quality is ideal for diagnosis.
Supplementary Table 1: 5-point Likert-Scale for qualitative assessment of real-time MRI acquisitions
